# Supplementary material for: Comparison of the Diagnostic Accuracies of Monocyte Distribution Width, Procalcitonin, and C-Reactive Protein for Sepsis: A Systematic Review and Meta-Analysis
Source: PubMed Central journal article supplement — Crit Care Med. 2023 Mar 6;51(5):e106–14. doi: 10.1097/CCM.0000000000005820 (PMC10090344; doi:10.1097/ccm.0000000000005820), 2023-03-06

eTable 1. Main characteristics of the included studies

| Author     | Year | Country | Study design | Setting | Cutoff (U) | Anticoagulation      | Diagnostic criteria | Sample size | Prevalence (sepsis) | TP  | FP   | TN   | FN  | Sensitivity | Specificity |
|------------|------|---------|--------------|---------|------------|----------------------|---------------------|-------------|---------------------|-----|------|------|-----|-------------|-------------|
| Ognibene   | 2022 | Italy   | NR           | ED      | 20         | K <sub>2</sub> -EDTA | Sepsis-3            | 308         | 24.7%               | 71  | 135  | 97   | 5   | 0.93        | 0.42        |
| Malinovska | 2022 | USA     | PS           | ED      | 20         | K <sub>2</sub> -EDTA | Sepsis-3            | 7952        | 2.3%                | 140 | 2577 | 5195 | 40  | 0.78        | 0.67        |
| Yu         | 2022 | Korea   | RS           | ED      | 21.935     | K <sub>2</sub> -EDTA | Sepsis-3            | 1234        | 6.7%                | 69  | 196  | 956  | 13  | 0.84        | 0.83        |
| Poz        | 2022 | Italy   | PS           | ED      | 20.1       | K <sub>2</sub> -EDTA | Sepsis-2            | 985         | 6.4%                | 55  | 261  | 661  | 8   | 0.87        | 0.72        |
| Li         | 2021 | Taiwan  | PS           | ED      | 20         | K <sub>2</sub> -EDTA | Sepsis-3            | 402         | 13.4%               | 49  | 219  | 129  | 5   | 0.91        | 0.37        |
| Hausfater  | 2021 | France  | PS           | ED      | 21.5       | K <sub>3</sub> -EDTA | Sepsis-3            | 1517        | 9.5%                | 117 | 426  | 947  | 27  | 0.81        | 0.69        |
| Woo        | 2021 | Korea   | PS           | ED      | 19.8       | K <sub>2</sub> -EDTA | Sepsis-3            | 549         | 34.2%               | 156 | 181  | 180  | 32  | 0.83        | 0.50        |
| Polilli    | 2021 | Italy   | PS           | ICU     | 20         | K <sub>3</sub> -EDTA | Sepsis-3            | 129         | 57.4%               | 71  | 35   | 20   | 3   | 0.96        | 0.36        |
| Piva       | 2021 | Italy   | PS           | ICU     | 24.63      | K <sub>2</sub> -EDTA | Sepsis-3            | 506         | 22.1%               | 75  | 88   | 306  | 37  | 0.67        | 0.78        |
| Hou        | 2021 | Taiwan  | RS           | ED      | 22.1       | NR                   | Sepsis-2            | 1480        | 20.0%               | 191 | 469  | 715  | 105 | 0.65        | 0.60        |
| Agnello    | 2021 | Italy   | RS           | ICU     | 23         | K <sub>3</sub> -EDTA | Sepsis-3            | 82          | 28.1%               | 22  | 19   | 40   | 1   | 0.96        | 0.68        |
| Agnello    | 2021 | Italy   | RS           | ED      | 23         | K <sub>3</sub> -EDTA | Sepsis-2            | 703         | 6.8%                | 38  | 105  | 550  | 10  | 0.79        | 0.84        |
| Agnello    | 2020 | Italy   | RS           | ED      | 23         | K <sub>3</sub> -EDTA | Sepsis-2            | 2215        | 4.0%                | 81  | 201  | 1926 | 7   | 0.92        | 0.91        |
| Polilli    | 2020 | Italy   | PS           | Ward    | 22         | K <sub>3</sub> -EDTA | Sepsis-3            | 260         | 40.4%               | 99  | 47   | 108  | 6   | 0.94        | 0.70        |
| Guo        | 2019 | China   | PS           | ED      | 19.19      | NR                   | Sepsis-3            | 154         | 26.6%               | 31  | 27   | 86   | 10  | 0.76        | 0.76        |
| Crouser    | 2019 | USA     | PS           | ED      | 20         | K <sub>2</sub> -EDTA | Sepsis-2            | 2158        | 17.8%               | 285 | 496  | 1277 | 100 | 0.74        | 0.72        |
| Crouser    | 2019 | USA     | PS           | ED      | 20         | K <sub>2</sub> -EDTA | Sepsis-2            | 505         | 13.3%               | 48  | 137  | 301  | 19  | 0.72        | 0.69        |
| Crouser    | 2017 | USA     | PS           | ED      | 20.5       | K <sub>2</sub> -EDTA | Sepsis-2            | 1320        | 7.4%                | 75  | 349  | 873  | 23  | 0.77        | 0.71        |

U: unit; NR: non reported; PS: prospective studies; RS: retrospective studies; ED: emergency department; ICU: intensive care unit; TP: true positive; FP: false positive; TN: true negative; FN: false negative

eTable 2. Summary of subgroup analysis of monocyte distribution width in the diagnosis of sepsis

| Subgroup                 | Number of studies | Pooled sensitivity (95% CI) | Heterogeneity I <sup>2</sup> (%) | Subgroup difference P value | Pooled specificity (95% CI) | Heterogeneity I <sup>2</sup> (%) | Subgroup difference P value | AUC (95% CI)    |
|--------------------------|-------------------|-----------------------------|----------------------------------|-----------------------------|-----------------------------|----------------------------------|-----------------------------|-----------------|
| Source of patients       |                   |                             |                                  |                             |                             |                                  |                             |                 |
| ICUs                     | 3                 | 0.90(0.67,0.98)             | 89.9                             | 0.33                        | 0.62(0.41,0.80)             | 94.4                             | 0.54                        | 0.88(0.75,1.06) |
| EDs                      | 14                | 0.81(0.77,0.86)             | 79.7                             |                             | 0.69(0.61,0.77)             | 98.6                             |                             | 0.84(0.80,0.88) |
| Sample size              |                   |                             |                                  |                             |                             |                                  |                             |                 |
| Number of patients ≥ 650 | 9                 | 0.80(0.74,0.85)             | 80.7                             | 0.10                        | 0.76(0.69,0.82)             | 98.7                             | 0.01*                       | 0.84(0.78,0.92) |
| Number of patients < 650 | 9                 | 0.88(0.79,0.93)             | 84                               |                             | 0.59(0.48,0.70)             | 96.1                             |                             | 0.86(0.81,0.91) |
| Diagnostic criteria      |                   |                             |                                  |                             |                             |                                  |                             |                 |
| Sepsis-2                 | 7                 | 0.79(0.71,0.85)             | 81.3                             | 0.07                        | 0.76(0.67,0.83)             | 98.6                             | 0.046*                      | 0.83(0.76,0.91) |
| Sepsis-3                 | 11                | 0.87(0.80,0.91)             | 79.1                             |                             | 0.63(0.53,0.72)             | 97.5                             |                             | 0.87(0.83,0.91) |
| Study design             |                   |                             |                                  |                             |                             |                                  |                             |                 |
| Prospective              | 13                | 0.83(0.77,0.87)             | 76                               | 0.77                        | 0.67(0.59,0.74)             | 96.8                             | 0.14                        | 0.85(0.81,0.89) |
| Retrospective            | 4                 | 0.85(0.68,0.94)             | 89.1                             |                             | 0.78(0.64,0.88)             | 99.2                             |                             | 0.86(0.62,1.40) |
| Region                   |                   |                             |                                  |                             |                             |                                  |                             |                 |
| Asia                     | 5                 | 0.80(0.71,0.87)             | 87.7                             | 0.31                        | 0.63(0.46,0.77)             | 98.7                             | 0.39                        | 0.80(0.72,0.91) |

|                  |    |                 |      |       |                 |      |        |                 |
|------------------|----|-----------------|------|-------|-----------------|------|--------|-----------------|
| Non-Asia         | 13 | 0.85(0.79,0.90) | 80.6 |       | 0.70(0.62,0.77) | 97.9 |        | 0.87(0.84,0.91) |
| Prevalence       |    |                 |      |       |                 |      |        |                 |
| ≥15%             | 9  | 0.85(0.75,0.92) | 88.7 | 0.55  | 0.62(0.53,0.71) | 95.7 | 0.11   | 0.84(0.77,0.91) |
| <15%             | 9  | 0.83(0.78,0.86) | 55.4 |       | 0.73(0.63,0.82) | 98.9 |        | 0.87(0.83,0.91) |
| Anticoagulant    |    |                 |      |       |                 |      |        |                 |
| K <sub>2</sub>   | 10 | 0.81(0.75,0.86) | 73.4 | 0.02* | 0.65(0.56,0.74) | 97.8 | 0.39   | 0.83(0.79,0.89) |
| K <sub>3</sub>   | 6  | 0.91(0.84,0.95) | 73.9 |       | 0.73(0.57,0.84) | 98.4 |        | 0.93(0.87,0.98) |
| Cutoff value (U) |    |                 |      |       |                 |      |        |                 |
| Cutoff ≥ 20.3    | 9  | 0.83(0.75,0.89) | 86.6 | 0.76  | 0.76(0.69,0.82) | 98.3 | <0.01* | 0.86(0.78,0.96) |
| Cutoff < 20.3    | 9  | 0.85(0.78,0.89) | 77   |       | 0.59(0.48,0.69) | 97.2 |        | 0.83(0.80,0.88) |

U: unit; ICUs: intensive care units; EDs: emergency departments

\* $P < 0.05$

eTable 3. Summary of diagnostic accuracy for biomarkers, monocyte distribution width (MDW), procalcitonin, and C-reactive protein, for the studies included

| Author, year   | Sepsis/<br>control (n) | MDW           |             |             |      | Procalcitonin     |             |             |      | C-reactive protein |             |             |      |
|----------------|------------------------|---------------|-------------|-------------|------|-------------------|-------------|-------------|------|--------------------|-------------|-------------|------|
|                |                        | Cutoff<br>(U) | Sensitivity | Specificity | AUC  | Cutoff<br>(ng/mL) | Sensitivity | Specificity | AUC  | Cutoff<br>(mg/L)   | Sensitivity | Specificity | AUC  |
| Ognibene 2022  | 76/232                 | 20            | 0.93        | 0.42        | 0.77 | 0.5               | 0.62        | 0.80        | 0.80 | 5                  | 0.95        | 0.22        | 0.71 |
| Yu 2022        | 82/1152                | 21.935        | 0.94        | 0.70        | 0.90 | 0.099             | 0.91        | 0.54        | 0.79 | 31.75              | 0.90        | 0.77        | 0.89 |
| Poz 2022       | 63/922                 | 20.1          | 0.87        | 0.72        | 0.85 | -                 | -           | -           | -    | 16.5               | 0.83        | 0.74        | 0.85 |
| Li 2021        | 54/348                 | 20            | 0.91        | 0.37        | 0.72 | 0.1               | 0.49        | 0.79        | 0.73 | -                  | -           | -           | -    |
| Hausfater 2021 | 144/1373               | 21.5          | 0.81        | 0.69        | 0.82 | 0.25              | 0.45        | 0.88        | 0.84 | 22                 | 0.85        | 0.72        | 0.85 |
| Woo 2021       | 188/361                | 19.8          | 0.83        | 0.50        | 0.71 | 0.05              | 0.77        | 0.67        | 0.76 | 4                  | 0.70        | 0.67        | 0.75 |
| Polilli 2021   | 74/55                  | 20            | 0.96        | 0.36        | 0.84 | 0.5               | 0.77        | 0.71        | 0.81 | -                  | -           | -           | -    |
| Polilli 2020   | 105/155                | 22            | 0.94        | 0.70        | 0.88 | 1                 | 0.83        | 0.87        | 0.88 | -                  | -           | -           | -    |
| Guo 2019       | 54/100                 | 19.19         | 0.76        | 0.76        | 0.77 | 0.51              | 0.79        | 0.93        | 0.90 | -                  | -           | -           | -    |

U: unit; AUC: Area under the receiver operating characteristic curve; -: Not available

eFigure 1. Deeks' funnel plot asymmetry test for publication bias

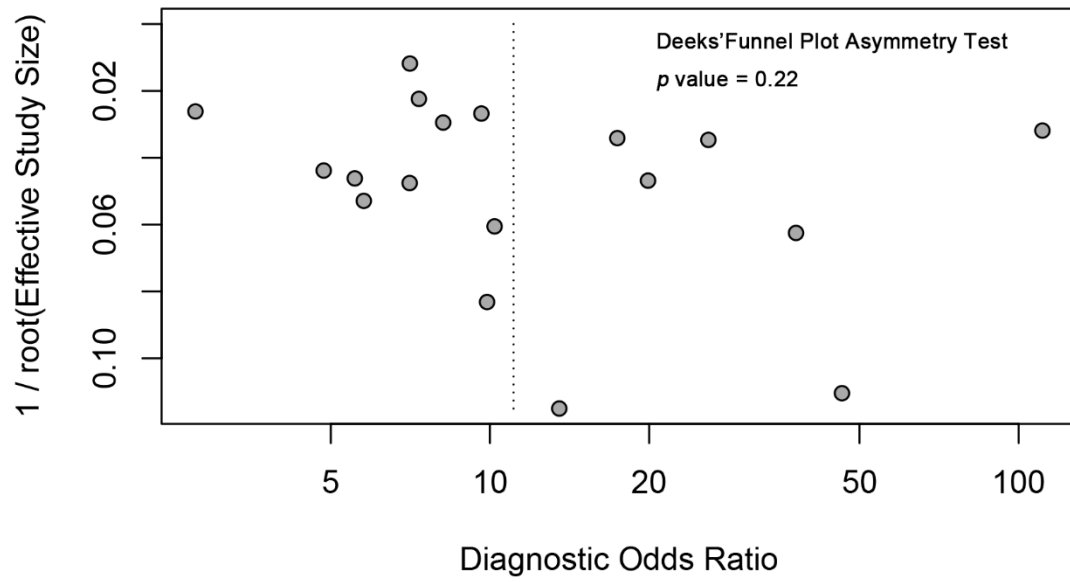

Supplement: ccm-51-e106-s001.pdf [file ccm-51-e106-s001.pdf]
